# Supplementary material
Source: PubMed Central journal article supplement (PMC2973921)
Supplement: 1009003107_pnas.1009003107_SI.pdf [file 1009003107_pnas.1009003107_SI.pdf]

# Supporting Information

Liscombe et al. 10.1073/pnas.1009003107

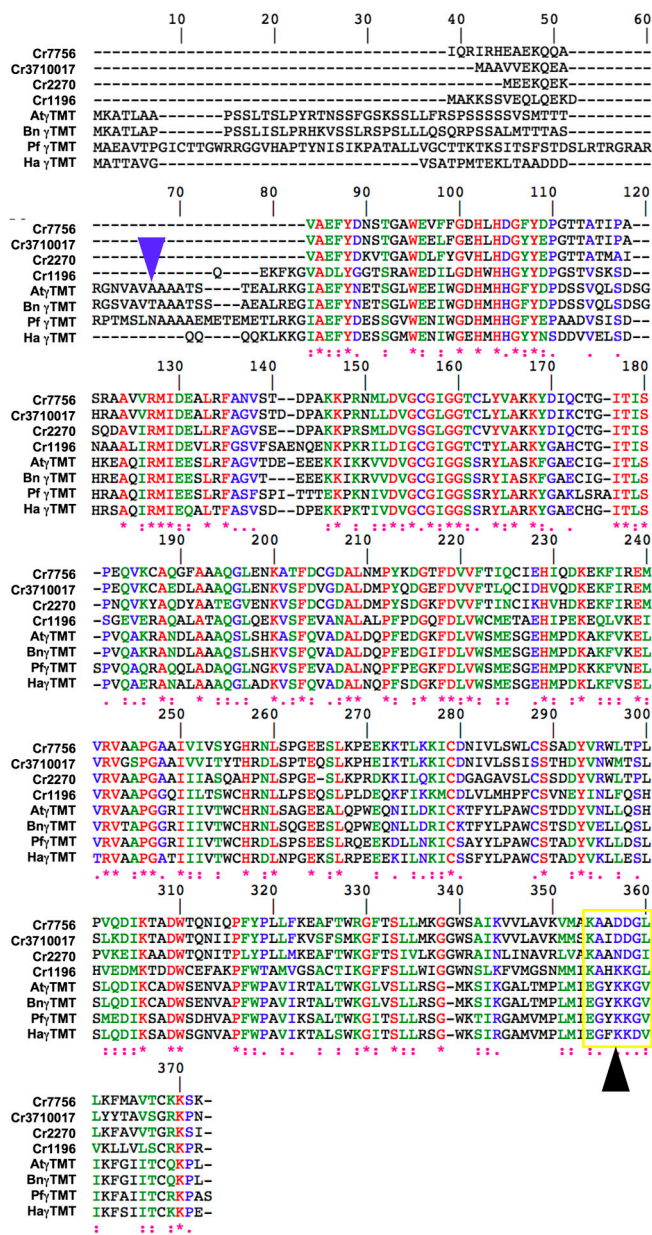

**Fig. S1.** Alignment of *Catharanthus roseus*  $\gamma$ -tocopherol methyltransferase-like proteins and validated  $\gamma$ -tocopherol methyltransferases. The residue color scheme is as follows: red, identical; green, highly similar; blue, weakly similar; black, different. A blue arrow denotes the transit peptide cleavage site in At $\gamma$ TMT, as predicted by ChloroP (1). The Rubisco large subunit methyltransferase (RubLSMT) consensus motif (2) is indicated by a yellow box, and a black arrow denotes lysine residue of  $\gamma$ -tocopherol methyltransferases that is methylated by RubLSMT.

1. Emanuelsson O, Nielsen H, von Heijne G (1999) ChloroP, a neural network-based method for predicting chloroplast transit peptides and their cleavage sites. *Protein Sci* 8:978–984.
2. Magnani R, Nayak NR, Mazaree M, Dirk LM, Houtz RL (2007) Polypeptide substrate specificity of PsLSMT. A set domain protein methyltransferase. *J Biol Chem* 282:27857–27864.

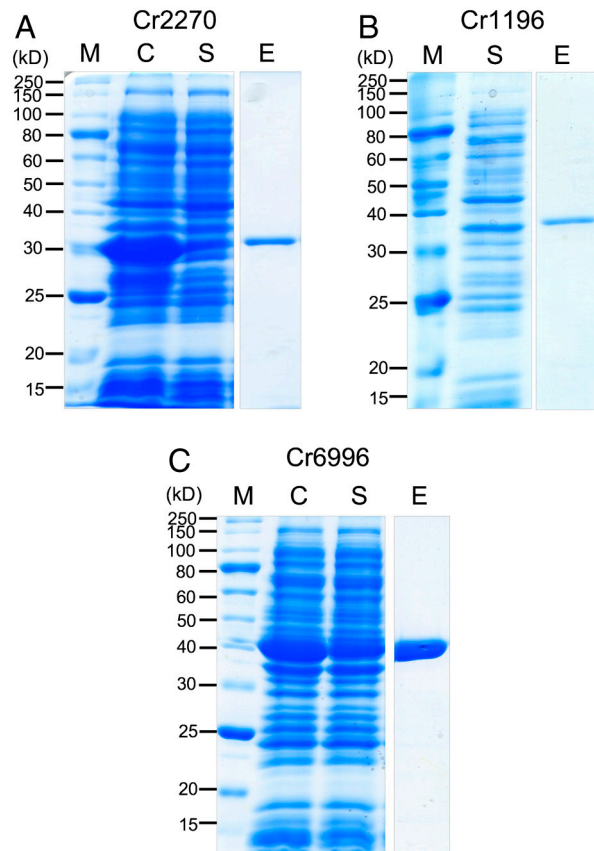

**Fig. S2.** SDS-PAGE analysis of purified recombinant proteins used in assays. (A) Cr2270, (B) Cr1196, and (C) Cr6996. Lanes are labeled as follows: M, marker; C, crude total protein; S, crude soluble protein; E, pure protein elution.





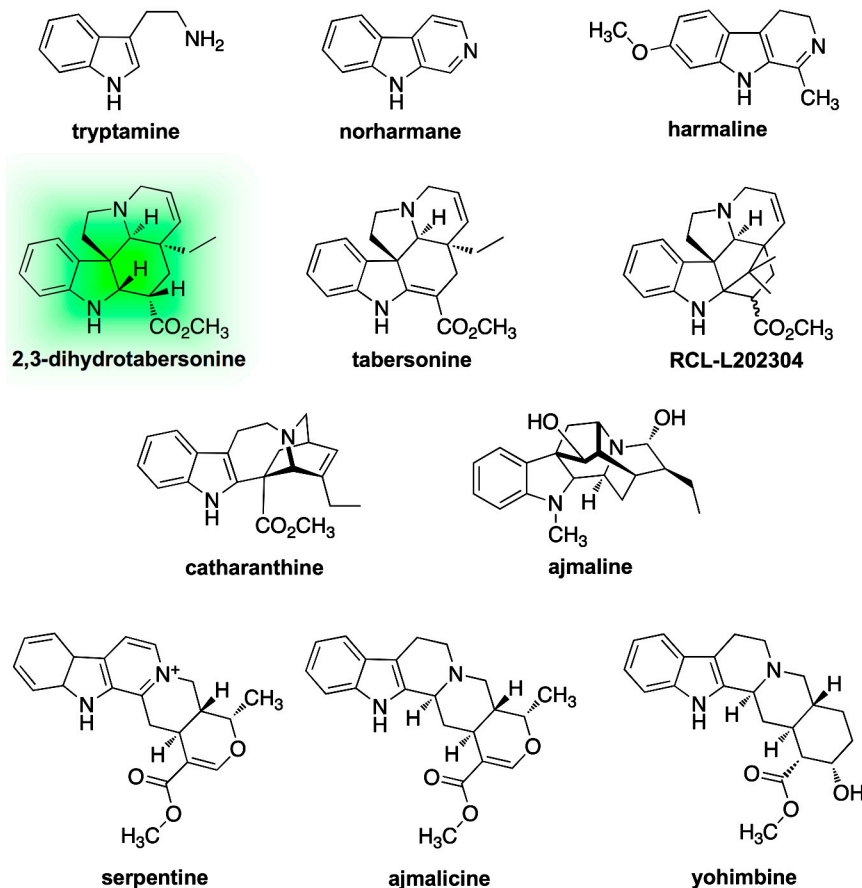

**Fig. S5.** Substrate specificity of purified, recombinant Cr2270. Structures of aspidosperma-, iboga-, and corynanthe-type alkaloids, along with a beta-carboline and a simple indole, tested as substrates with Cr2270. Only 2,3-dihydrotabersonine (DHT, highlighted in green) was accepted as a substrate.

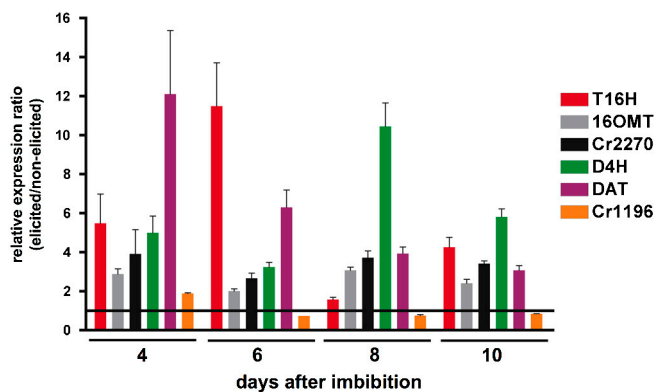

**Fig. S6.** Quantitative real-time PCR analysis of vindoline biosynthetic gene expression in *C. roseus* seedlings after receiving methyl jasmonate treatment 2 d after imbibition. Data are displayed as a relative expression ratio compared to untreated seedlings. Error bars represent SEM from at least three experiments. Abbreviations: T16H, tabersonine 16-hydroxylase; 16OMT, 16-hydroxytabersonine 16-*O*-methyltransferase; D4H, desacetoxyvindoline 4-hydroxylase; DAT, deacetylvindoline acetyltransferase.

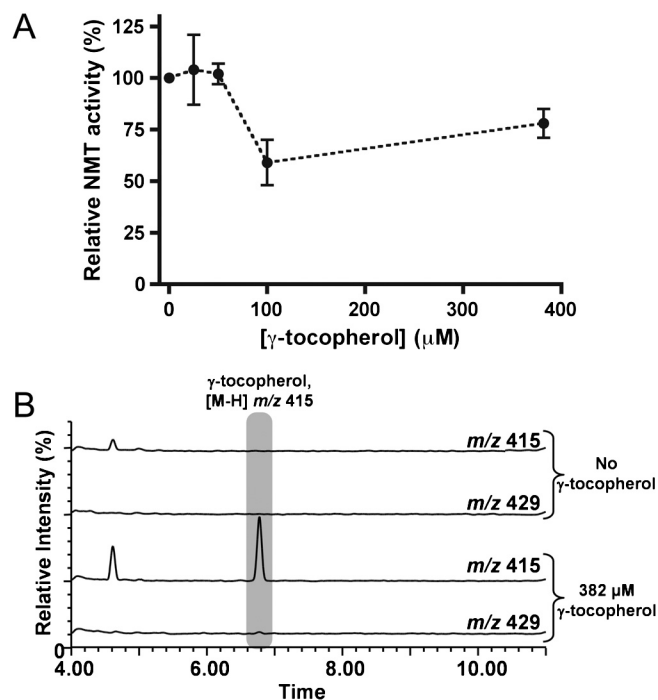

**Fig. S7.**  $\gamma$ -Tocopherol inhibits DHT 10 methylation by recombinant Cr2270, but is not turned over by the enzyme. (A) Cr2270-mediated DHT 10 methylation is inhibited by  $\gamma$ -tocopherol ([DHT] = 100  $\mu$ M; [SAM] = 200  $\mu$ M); (B) liquid chromatography-mass spectrometry analysis of the assays in (A) shows that  $\gamma$ -tocopherol ([M-H]  $m/z$  415) is not converted to  $\alpha$ -tocopherol ([M-H]  $m/z$  429) by Cr2270.

**Table S1. N-Methyltransferase candidates identified from BLAST searches of *Catharanthus roseus* EST assemblies**

| PUT ID    | Similar to functionally characterized protein                          | GenBank Accession # | %ID | Predicted full-length ORF? | EST origin*      |
|-----------|------------------------------------------------------------------------|---------------------|-----|----------------------------|------------------|
| Cr1189    | Resveratrol O-methyltransferase [ <i>Vitis vinifera</i> ]              | CAQ76879            | 64  | Yes                        | Root             |
| Cr1196    | $\gamma$ -tocopherol methyltransferase [ <i>Arabidopsis thaliana</i> ] | AAD02882            | 52  | No                         | Root             |
| Cr2270    | $\gamma$ -tocopherol methyltransferase [ <i>Arabidopsis thaliana</i> ] | AAD02882            | 42  | No <sup>†</sup>            | Leaf             |
| Cr2551    | Caffeic acid O-methyltransferase [ <i>Catharanthus roseus</i> ]        | AAK20170            | 52  | No                         | Root, flower bud |
| Cr5804    | loganic acid methyltransferase [ <i>Catharanthus roseus</i> ]          | ABW38009            | 43  | No                         | Root             |
| Cr6424    | Coclaurine N-methyltransferase [ <i>Coptis japonica</i> ]              | BAB71802            | 51  | No                         | Leaf             |
| Cr6996    | Putative O-methyltransferase [ <i>Catharanthus roseus</i> ]            | AAR02422            | 100 | Yes                        | CSC              |
| Cr7756    | $\gamma$ -tocopherol methyltransferase [ <i>Arabidopsis thaliana</i> ] | AAD02882            | 45  | No <sup>†</sup>            | Root             |
| Cr7789    | Putative O-methyltransferase [ <i>Catharanthus roseus</i> ]            | AAR02418            | 100 | Yes                        | CSC              |
| Cr8458    | Flavonoid 4'-O-methyltransferase [ <i>Mentha piperita</i> ]            | AAR09602            | 50  | No                         | Leaf             |
| Cr3710017 | $\gamma$ -tocopherol methyltransferase [ <i>Arabidopsis thaliana</i> ] | AAD02882            | 47  | No                         | Root, leaf       |
| Cr3910022 | $\gamma$ -tocopherol methyltransferase [ <i>Arabidopsis thaliana</i> ] | AAD02882            | 52  | No                         | Root             |

[www.plantgdb.org](http://www.plantgdb.org).

Abbreviations: CSC, cell suspension culture.

\*As per assembly details available at [plantgdb.org](http://plantgdb.org).

<sup>†</sup>Only missing 5' end predicted to encode a transit peptide.

**Table S2. Oligonucleotide primers used in this study**

| Primer name  | Sequence (5' to 3')                                 | Purpose                                      |
|--------------|-----------------------------------------------------|----------------------------------------------|
| 1196-F1      | AAA CTG CCG AGC ACA TCC                             | 3'-RACE                                      |
| 2551-F1      | TGT GGA CAA AGC ACA CTT CG                          | 3'-RACE                                      |
| 1196-F2      | CAG ATA ATT TTA ACG TCT TGG TGC C                   | 3'-RACE (nested)                             |
| 2551-F2      | CAC TTG AAA GAT GCA ATT CTT GAG GG                  | 3'-RACE (nested)                             |
| 3'-RACE PCR  | GGC CAC GCG TCG ACT AGT AC                          | 3'-RACE reverse                              |
| 1196-F3      | AAA GGA TCC ATG GCA AAA AAA TCA TCA GTA GAA CAA C   | Cr1196 ORF cloning                           |
| 1196-R2      | AAA AAG CTT TTA TCT GGG TTT TCG GCA CG              | Cr1196 ORF cloning                           |
| 2270F        | AAC ATT AGG ATC CAA AAC ATA CAA CAA TAC AAT GG      | Cr2270 ORF cloning                           |
| 2270R        | TTG TAA TCT CGA GTC ATA TTG ATT TTC GTC CC          | Cr2270 ORF cloning                           |
| 6996F        | AAC ATT AGG ATC CAT GGA AGT TCA ATC AGC C           | Cr6996 ORF cloning                           |
| 6996R        | TTG TAA TCT CGA GTC AAG GAT AAA CTT CAA TAA GAC TCC | Cr6996 ORF cloning                           |
| 7789F        | AAC ATT AGG ATC CAT GGA AGT TCA ATC AGT C           | Cr7789 ORF cloning                           |
| 7789R        | TTG TAA TCT CGA GTT AAG GAT AAA CCT CAA TAA TAC TCC | Cr7789 ORF cloning                           |
| cDNA cloning | GGC CAC GCG TCG ACT AGT ACT TTT TTT TTT TTT TV      | First strand cDNA synthesis for cloning ORFs |
| 2270-qF1     | TGA CAA AGT AAC CGG AGC ATG GGA                     | qPCR                                         |
| 2270-qR1     | ATC CGA ATG ACG GCA TCT TGG CTA                     | qPCR                                         |
| Cr16OMT_qF1  | GCC AAT CCT GCT CTT TCA TAA C                       | qPCR                                         |
| Cr16OMT_qR1  | AGC TTT AGA AGG GTG AAC TGG                         | qPCR                                         |
| CrD4H_qF1    | TAC CCT GCA TGC CCT CAA CC                          | qPCR                                         |
| CrD4H_qR1    | TTG AAG GCC GCC AAT TTG AT                          | qPCR                                         |
| CrDAT_qF1    | GAC CTA GTC CTT CCC AAA CG                          | qPCR                                         |
| CrDAT_qR1    | CCT CCA TCA GCA ACT TTG TG                          | qPCR                                         |
| CrEF1a_qF1   | TCA GGA GGC TCT TCC TGG TGA                         | qPCR                                         |
| CrEF1a_qR1   | AGC TCC CTT GGC AGG GTC AT                          | qPCR                                         |
| CrT16H_qF1   | AGG ACC TTG TTG ATG TGC TAC                         | qPCR                                         |
| CrT16H_qR1   | CAT TGC CCA ATC GAC TGT TG                          | qPCR                                         |
| Rbps9_qF1    | TTG AGC CGT ATC AGA AAT GC                          | qPCR                                         |
| Rbps9_qR1    | CCC TCA TCA AGC AGA CCA TA                          | qPCR                                         |

**Table S3. Accession numbers for sequences used to construct neighbor-joining tree**

| Abbreviation         | Annotation [organism]                                                                                  | Accession #  |
|----------------------|--------------------------------------------------------------------------------------------------------|--------------|
| AbPNMT               | Putrescine <i>N</i> -methyltransferase 1 [ <i>Atropa belladonna</i> ]                                  | BAA82264     |
| At <sub>γ</sub> TMT  | Gamma-tocopherol methyltransferase [ <i>Arabidopsis thaliana</i> ]                                     | AAD02882     |
| AtSMT1               | Sterol 24-C-methyltransferase 1 [ <i>Arabidopsis thaliana</i> ]                                        | NP_001078579 |
| AtSMT2-              | Sterol methyltransferase 2 [ <i>Arabidopsis thaliana</i> ]                                             | NP_173458    |
| AtSMT3               | Sterol 24-C-methyltransferase 3 [ <i>Arabidopsis thaliana</i> ]                                        | NP_177736    |
| AtUCMT               | Uroporphyrinogen III methyltransferase [ <i>Arabidopsis thaliana</i> ]                                 | AAB92677     |
| Bn <sub>γ</sub> TMT  | Gamma-tocopherol methyltransferase [ <i>Brassica napus</i> ]                                           | ACJ54674     |
| BvCFAPS              | Cyclopropane-fatty-acyl-phospholipid synthase [ <i>Burkholderia vietnamiensis</i> ]                    | YP_001120490 |
| CaDMXNMT             | 3,7-dimethylxanthine <i>N</i> -methyltransferase [ <i>Coffea arabica</i> ]                             | BAC75663     |
| CaMXNMT              | 7-methylxanthine <i>N</i> -methyltransferase [ <i>Coffea arabica</i> ]                                 | BAB39216     |
| CbSAMT               | Salicylic acid carboxyl methyltransferase [ <i>Clarkia breweri</i> ]                                   | 34809619     |
| CjCNMT               | Coclaurine <i>N</i> -methyltransferase [ <i>Coptis japonica</i> ]                                      | BAB71802     |
| CjCoOMT              | Columbamine <i>O</i> -methyltransferase [ <i>Coptis japonica</i> ]                                     | Q8H9A8       |
| CjSOMT               | Scoulerine 9- <i>O</i> -methyltransferase [ <i>Coptis japonica</i> ]                                   | BAA06192     |
| Cr16OMT              | 16-hydroxytabersonine <i>O</i> -methyltransferase [ <i>Catharanthus roseus</i> ]                       | ABR20103     |
| CrLAMT               | Loganic acid <i>O</i> -methyltransferase [ <i>Catharanthus roseus</i> ]                                | ABW38009     |
| CsCafSyn             | Caffeine synthase [ <i>Camellia sinensis</i> ]                                                         | BAB12278     |
| DsPNMT               | Putrescine <i>N</i> -methyltransferase [ <i>Datura stramonium</i> ]                                    | CAE47481     |
| GmSMT1               | Sterol 24-C-methyltransferase 2-1 [ <i>Glycine max</i> ]                                               | ACS93763     |
| GmSMT2               | Sterol 24-C-methyltransferase 2-2 [ <i>Glycine max</i> ]                                               | ACS93764     |
| Hay <sub>γ</sub> TMT | Gamma-tocopherol methyltransferase [ <i>Helianthus annuus</i> ]                                        | ABB52798     |
| LePEANMT             | Phosphoethanolamine <i>N</i> -methyltransferase [ <i>Solanum lycopersicum</i> ]                        | AAG59894     |
| LIBANMT              | Beta-alanine <i>N</i> -methyltransferase [ <i>Limonium latifolium</i> ]                                | AAP03058     |
| MICFAPS              | Cyclopropane-fatty-acyl-phospholipid synthase [ <i>Mesorhizobium loti</i> ]                            | BAB53730     |
| MtPcaA               | Mycolic acid synthase (cyclopropane synthase) [ <i>Mycobacterium tuberculosis</i> ]                    | CAE55286     |
| Pf <sub>γ</sub> TMT  | Gamma-tocopherol methyltransferase [ <i>Perilla frutescens</i> ]                                       | AAL36933     |
| PiOMT1               | Ipecac alkaloid <i>O</i> -methyltransferase 1 [ <i>Psychotria ipecacuanha</i> ]                        | BAI79243     |
| Ps4'OMT2             | 3'-hydroxy- <i>N</i> -methylcoclaurine 4'- <i>O</i> -methyltransferase 2 [ <i>Papaver somniferum</i> ] | AAP45314     |
| Ps6OMT               | ( <i>R,S</i> )-norcoclaurine 6- <i>O</i> -methyltransferase [ <i>Papaver somniferum</i> ]              | AAQ01669     |
| Ps7OMT               | ( <i>R,S</i> )-reticuline 7- <i>O</i> -methyltransferase [ <i>Papaver somniferum</i> ]                 | AAQ01668     |
| PsCNMT               | Coclaurine <i>N</i> -methyltransferase [ <i>Papaver somniferum</i> ]                                   | AAP45316     |
| PsN7OMT              | Norreticuline-7- <i>O</i> -methyltransferase [ <i>Papaver somniferum</i> ]                             | ACN88562     |
| PsTNMT               | ( <i>S</i> )-tetrahydroprotoberberine- <i>cis-N</i> -methyltransferase [ <i>Papaver somniferum</i> ]   | AAY79177     |
| RgANMT               | Anthranilate <i>N</i> -methyltransferase [ <i>Ruta graveolens</i> ]                                    | ABI93949     |
| SoPEANMT             | Phosphoethanolamine <i>N</i> -methyltransferase [ <i>Spinacia oleracea</i> ]                           | AAF61950     |
| TfCNMT               | Coclaurine <i>N</i> -methyltransferase [ <i>Thalictrum flavum</i> ]                                    | AAU20766     |
| ZmUCMT               | Uroporphyrinogen III methyltransferase [ <i>Zea mays</i> ]                                             | BAA11909     |
